# Supplementary material
Source: HighWire-hosted journal article supplement (https://bmjopen.bmj.com/content/8/9/e022357)
Supplement: inline-supplementary-material-1 [file inline-supplementary-material-1.pdf]

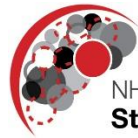

## **Investigating researchers' opinions about research translation**

*Thank you for completing this survey about your opinions and experience of translating your research. Your information will be shared with the Implementation Science research team (Associate Professor Dominique Cadilhac, Professor Sandy Middleton, Dr Elizabeth Lynch) for purposes of research and to improve the capacity of researchers affiliated with the Centre of Research Excellence: Stroke Rehabilitation and Brain Recovery to translate their research. Any presentations or publications from this research will not include any information that allows individuals to be identified.*

*Completion of this questionnaire is voluntary. Consent to participate is implied through completion of the questionnaire.*

### 1. What is your professional background?

- Medicine
- Nursing
- Physiotherapist
- Occupational therapist
- Speech pathologist
- Psychologist
- Science
- Social science
- Economics/finance
- Other \_\_\_\_\_

### When did you complete your PhD?

- Have not completed PhD, not enrolled in research training program
- Currently enrolled in research training program (Honours, Masters, PhD)
- Within last 5 years
- >5-10 years
- >10-15 years
- >15-20 years
- >20 years

3. What is your gender?

- Male
- Female

4. Are you currently involved in conducting research?

- Yes
- No

5. Which best describes your main research focus? Tick one response only

- Animal research
- Human cellular/preclinical research
- Other basic science research
- Clinical/qualitative research with stroke survivor participants
- Clinical/qualitative research with caregivers/family of stroke survivors
- Health services research (includes data linkage & implementation research)
- Health economics
- Other \_\_\_\_\_

6. If working with human participants, what types of study designs are you currently using)?

Tick all that apply

- Observational/cohort/longitudinal study
- Qualitative study
- Pilot RCT
- RCT (or c-RCT)
- Scale-up or monitoring of intervention with proven effectiveness
- Mixed methods research
- Program evaluation or health economics research
- Simulation or modelling
- NA (not working with human participants)

7. What is your role in the CRE for Stroke Rehabilitation and Brain Repair?

- Named investigator on grant application
- Conducting research affiliated with/supported by CRE
- I have an administrative role in the CRE
- I am not involved with the Stroke CRE (here as a guest)

8. Are you employed by the CRE?

- Yes
- No

9. What stream/s within the CRE are you most involved in? Tick one response only

- Basic science
- Imaging
- Clinical trials
- Implementation science
- Data linkage
- I am involved in all the streams equally
- I am not involved in any of the streams (here as a guest)

10. I consider each research project complete when (tick all that apply):

- Funding for trial is spent
- Data analysis is complete
- Results are presented in academic publication
- Findings have led to new trials/projects
- Findings have been incorporated into clinical practice or policy
- Other \_\_\_\_\_

11. I measure the impact of my research by (tick all that apply)

- Number of academic publications
- Number of article citations
- Social and electronic media presence (eg twitter, newsletter, work website)
- Number of clinicians using results of my research
- Incorporation into clinical guidelines
- Incorporation into policy
- Awards or grants
- Other \_\_\_\_\_

**The following questions refer to “translating your research” – regardless of the type of research you do  
 Broadly, translation refers to adapting the findings from one research context to allow use in a different context e.g. animal or basic science research leading to studies in humans, studies in humans being applied in clinical practice**

Please rated your agreement with the following statements

(SD=strongly disagree, D=disagree, N=neither agree not disagree, A=agree, SA=strongly agree)

|                                                                                                             | SD | D | N | A | SA |
|-------------------------------------------------------------------------------------------------------------|----|---|---|---|----|
| 12. It is important to me that my research findings are translated                                          |    |   |   |   |    |
| 13. My research is not the sort of research that can be translated                                          |    |   |   |   |    |
| 14. It is my responsibility to ensure that my findings are translated                                       |    |   |   |   |    |
| 15. It is the responsibility of someone else in my research team to ensure that our findings are translated |    |   |   |   |    |
| 16. Clinicians should be responsible for translating research findings into clinical practice               |    |   |   |   |    |
| 17. I know which strategies should be used (by myself/others) to translate my research                      |    |   |   |   |    |
| 18. I have the skills to ensure my research is translated                                                   |    |   |   |   |    |
| 19. There is adequate funding available to support translation of my research                               |    |   |   |   |    |
| 20. Spending time on translating my research would take me away from research I enjoy                       |    |   |   |   |    |
| 21. Researchers with experience/interest in implementation should translate my research                     |    |   |   |   |    |
| 22. Every research team should include a researcher with expertise in implementation                        |    |   |   |   |    |

23. Do you have any other comments about the translation of research?
