# Supplementary material
Source: HighWire-hosted journal article supplement (https://bmjopen.bmj.com/content/8/9/e022357)
Supplement: inline-supplementary-material-2 [file inline-supplementary-material-2.pdf]

## Interview guide

1. Can you tell me about the research you are currently involved in?
2. How will the findings of your research be used?
3. Would it be beneficial for the findings from your research to be translated and used by a different group of people (eg researchers, clinicians, people with stroke, policy makers?)
4. When did you start thinking about who might use your research?
5. How important is it to you that your research findings are translated? Why?
6. What would translation of your research look like – can you describe it? (who would use it, how would it be used)
7. What impact do you anticipate your research will have should it be implemented? (Who would benefit and what would that benefit look like for them?)
8. Have you thought about potential risks should your research be implemented or any other impacts such as an increase in the cost of treatment/care?
9. Have any of your research findings to date been translated? (Translation can include changing knowledge eg presentations and publications or promoting use of research findings)  
Describe (what were the findings, what was the original context/population, what was the translated context/population, how true to your findings was the translation, were you sought as advisor, what were your feelings about it, how was success of translation evaluated)
10. If no to Q6 – have you had findings that you think should have been translated – what has prevented this from happening?
11. Have you had experience in translating other people's research findings from one context to another? Please describe (what motivated you to translate the findings, what context/population was translated to and from, how did the process unfold, what was hard, what made it easier, how successful was the process, how did you evaluate success of process, what would you advise other people to do if they wanted to translate a similar project – what do you wish you had known at the start) \*
12. Are some projects more translatable than others? What makes a good translation project? \*
13. Who should be responsible for ensuring research findings in your field are translated?
14. What are the barriers to the findings of your research being used by other people (researchers, clinicians, people with stroke, policy makers etc) \*
15. What would make it easier to translate your research findings? \*
16. For clinical researchers: could you think of ways to promote the translation of positive research findings (and removal of proven ineffective treatments) into usual care? \*

\*Responses to these questions not reported in current paper
